# Supplementary material
Source: PubMed Central journal article supplement (PMC4914688)
Supplement: AAC.03098-15_zac007165309so1.pdf [file AAC.03098-15_zac007165309so1.pdf]

# Supplemental material

1  
2  
3  
4  
5  
6  
7  
8  
9  
10  
11  
12  
13  
14  
15  
16  
17  
18  
19  
20  
21  
22

## **Stability of novel siderophore cephalosporin S-649266 to clinically relevant carbapenemases.**

Ito-Horiyama, T. *et al.*

### **Materials and Methods**

#### **Antibacterial agent**

S-649266 synthesized at Shionogi & Co., Ltd. (Osaka, Japan) and commercially available antibacterial agents were used; meropenem, ceftazidime, and cefepime were from United States Pharmacopeial Convention (Rockville, MD), and nitrocefin was from Oxoid (Hampshire, UK).

#### **Antibiotic susceptibility testing**

Minimum inhibitory concentrations (MICs) were determined using cation-adjusted Mueller-Hinton broth (CAMHB; BBL, Franklin Lakes, NJ) according to the Clinical and Laboratory Standards Institute (CLSI) recommendations (1) except that CAMHB for the MIC determination of S-649266 was supplemented with 20  $\mu$ M of human apo-transferrin (apo-T; BBI Solutions, Cardiff, UK) to create ferric iron-deficient condition that mimic human fluids such as blood (2-4). It has been reported that the antibacterial activity of siderophore  $\beta$ -lactams including S-649266 are affected by the surrounding free-iron concentrations (5), and *in vivo* efficacy of S-649266 is best correlated with the MIC values determined in ferric iron-deficient condition (6).

23 Bacterial strains used in this study were kindly provided by Dr. Patrice Nordmann  
24 (University of Fribourg, Switzerland), Dr. Yoshichika Arakawa (Nagoya, Japan), Dr.  
25 Tse Hsien Koh (Singapore General Hospital, Singapore), and JMI laboratories (North  
26 Liberty, IA).

### 27 **Purification of $\beta$ -lactamases**

28 The  $\beta$ -lactamases IMP-1, VIM-2, NDM-1, KPC-3, and OXA-23 were purified as a  
29 native form without any affinity tags from *E. coli* BL21 derived strains with each  
30 expression vector of pET9a or pET28a system (Table S2). The detailed procedures for  
31 culture and purification of each  $\beta$ -lactamase are described in the supplemental materials.  
32 L1 was purified from clinical isolate *Stenotrophomonas maltophilia* ULA511 according  
33 to the previous report (7). All the purified enzymes yielded a single band in sodium  
34 dodecyl sulfate polyacrylamide gel electrophoresis and estimated protein purity was  
35 >90% by Coomassie Brilliant Blue staining. The detailed purification procedures are as  
36 follows.

37 To obtain IMP-1, *E. coli* TUM3919 was cultured in Luria-Bertani (LB) broth  
38 (Becton, Dickinson and Company) containing 50  $\mu$ g/mL kanamycin at 35°C. When the  
39 absorbance value was 0.5 to 0.7 at 600 nm, 1 mM isopropyl  
40  $\beta$ -D-1-thiogalactopyranoside (IPTG) was added and incubated for 2 more hours. The  
41 cells were harvested by centrifugation and re-suspended in 50 mM HEPES containing  
42 50  $\mu$ M ZnSO<sub>4</sub> (pH 7.5) (buffer A). The cells were disrupted by sonication on ice,  
43 followed by ultracentrifugation and purification using HiTrap SP HP column (GE  
44 Healthcare, Buckinghamshire, UK) equilibrated with buffer A. The enzyme was eluted  
45 with a linear salt gradient (0 to 1 M of NaCl). The fractions hydrolysing nitrocefin were  
46 collected and concentrated. The sample was dialyzed overnight at 4°C with buffer A

47 and concentrated, and then loaded onto a MonoS HR 5/5 (GE Healthcare,  
48 Buckinghamshire, UK) equilibrated with buffer A. The enzyme was eluted with a linear  
49 salt gradient (0 to 1 M of NaCl). The fractions hydrolysing nitrocefin were collected and  
50 concentrated.

51 To obtain VIM-2, *E. coli* TUM4664 was cultured in LB broth containing 50  
52 µg/mL kanamycin at 35°C. The supernatant was obtained by centrifugation and 50%  
53 solid ammonium sulphate was added. After gentle stirring for 1 hour at 4°C, the  
54 supernatant was obtained by centrifugation and 80% solid ammonium sulphate was  
55 added. The precipitate was collected by centrifugation and solubilized in 20 mM  
56 triethanolamine (pH 7.2) (buffer B). After overnight dialysis with buffer B, the sample  
57 was loaded onto a Source 15Q (GE Healthcare, Buckinghamshire, UK) equilibrated  
58 with buffer B and the crude enzyme was eluted with a linear salt gradient (0 to 1 M of  
59 NaCl). The fractions hydrolysing nitrocefin were collected and concentrated. The  
60 concentrated sample was injected onto a Source 15Q (GE Healthcare, Buckinghamshire,  
61 UK) equilibrated with buffer A and the crude enzyme was eluted with a linear salt  
62 gradient (0 to 1 M of NaCl) again. The fractions hydrolysing nitrocefin were collected  
63 and concentrated.

64 To obtain NDM-1, *E. coli* SR08592 was cultured for 3 hours in Buffered Super  
65 Broth (yeast extract 20 g/L, tryptone 35 g/L, NaCl 5 g/L, buffered with 50 mM sodium  
66 phosphate buffer pH7.0) (8) containing 30 µg/mL kanamycin at 35°C. When the  
67 absorbance value was 1 at 600 nm, 0.2% arabinose was added and incubated for 5 hours  
68 at 25°C. The cells were collected and disrupted by sonication on ice. The crude extract  
69 was loaded onto a Q Sepharose FF (GE Healthcare, Buckinghamshire, UK) equilibrated  
70 with 20 mM Bis-Tris containing 5 µM ZnSO<sub>4</sub> (pH 6.0) and the crude enzyme was

71 eluted with 60 mM NaCl. The fractions hydrolysing nitrocefin were collected and  
72 purified with Superdex 200 pg 26/60 (GE Healthcare, Buckinghamshire, UK)  
73 equilibrated with 20 mM HEPES containing 50  $\mu$ M ZnSO<sub>4</sub> (pH 7.0).

74 To obtain KPC-3, *E. coli* TUM3923 was cultured in LB broth containing 50  
75  $\mu$ g/mL kanamycin at 35°C. When the absorbance value was 0.5 to 0.7 at 600 nm, 1 mM  
76 IPTG was added and incubated for 4 more hours. The cells were harvested by  
77 centrifugation and re-suspended in 30 mM Tris-HCl containing 30% sucrose (pH 8.0).  
78 Purification was conducted as described previously (9).

79 To obtain OXA-23, *E. coli* TUM3920 was cultured in LB containing 50  $\mu$ g/mL  
80 kanamycin (Wako Pure Chemical Industries, Osaka, Japan) at 20°C. When the  
81 absorbance value was 0.7 at 600 nm, 1 mM IPTG was added and incubated for 18 more  
82 hours. The cells were collected and disrupted on ice by sonication. The crude extract  
83 was loaded onto a SOURCE 15Q (GE Healthcare, Buckinghamshire, UK) equilibrated  
84 with 10 mM Bis-Tris-propane (pH 9.4) (buffer C) and the crude enzyme was eluted  
85 with a linear salt gradient (0 to 1 M of NaCl). The fractions hydrolysing nitrocefin were  
86 collected and purified with HiLoad 16/600 Superdex 200 pg (GE Healthcare,  
87 Buckinghamshire, UK) equilibrated with buffer C.

#### 88 **Determination of kinetic parameters and relative hydrolysis velocity**

89 Hydrolysis of  $\beta$ -lactams was detected by monitoring the changes in the absorbance of  
90  $\beta$ -lactam solution at 30°C in 20 mM HEPES buffer (pH 7.5) containing 50  $\mu$ M ZnCl<sub>2</sub>  
91 for IMP-1, VIM-2, L1, and NDM-1, 50 mM phosphate buffer (pH 7.0) for KPC-3, and  
92 100 mM Tris-H<sub>2</sub>SO<sub>4</sub>, 300 mM K<sub>2</sub>SO<sub>4</sub> (pH 7.0) containing 10 mM NaHCO<sub>3</sub> for OXA-23.  
93 The absorbance of  $\beta$ -lactam solution was monitored by UV-2550 spectrophotometer  
94 (Shimadzu, Japan) or U-3010 (Hitachi, Japan). The wavelengths (nm) and molar

95 extinction coefficients ( $\Delta\epsilon$ ) for S-649266 was determined by measuring the change in  
96 the absorbance divided by the molarity for complete hydrolysis of S-649266 by addition  
97 of NaOH, and those for each  $\beta$ -lactam and reporter substrate were referred from the  
98 previous report (7): S-649266 ( $\Delta\epsilon_{259\text{ nm}} = -9430\text{ M}^{-1}\text{ cm}^{-1}$ ), imipenem ( $\Delta\epsilon_{278\text{ nm}} = -5660$   
99  $\text{M}^{-1}\text{ cm}^{-1}$ ), meropenem ( $\Delta\epsilon_{298\text{ nm}} = -9530\text{ M}^{-1}\text{ cm}^{-1}$ ), ceftazidime ( $\Delta\epsilon_{265\text{ nm}} = -10300\text{ M}^{-1}$   
100  $\text{cm}^{-1}$ ), cefepime ( $\Delta\epsilon_{267\text{ nm}} = -9120\text{ M}^{-1}\text{ cm}^{-1}$ ), nitrocefin ( $\Delta\epsilon_{482\text{ nm}} = 10000\text{ M}^{-1}\text{ cm}^{-1}$ ).  
101 Bovine serum albumin (BSA; Sigma-Aldrich, St. Louis, MO) was added to diluted  
102 solutions of  $\beta$ -lactamase to prevent denaturation (final concentration of 20  $\mu\text{g/mL}$ ). The  
103 steady-state kinetic parameters ( $k_{\text{cat}}$  and  $K_{\text{m}}$ ) were determined by using the Hanes  
104 linearization of the Michaelis-Menten equation (10). For poor hydrolysing substrates,  
105 the competitive inhibition constant ( $K_{\text{i}}$ ) instead of  $K_{\text{m}}$  was determined in the presence of  
106 100  $\mu\text{M}$  of reporter substrate. Nitrocefin was used as a reporter substrate for IMP-1,  
107 VIM-2, KPC-3, and OXA-23, and imipenem was used as a reporter substrate for L1.  
108 The  $k_{\text{cat}}$  was determined at more than 5-fold higher concentration of the  $K_{\text{i}}$  value. When  
109 hydrolysis of tested  $\beta$ -lactam was not observed, the  $k_{\text{cat}}$  was described as no hydrolysis  
110 detected (NH); change in absorbance was too small to calculate initial hydrolysis  
111 velocity, i.e.  $\leq 0.001$  after measurement of 90 seconds with 100  $\mu\text{M}$  substrate. The  $k_{\text{cat}}$   
112 value was shown as not determined (ND) in the following cases; 1) the  $K_{\text{i}}$  value was too  
113 high and 5-fold higher concentration of the  $K_{\text{i}}$  value was exceeded the detection limit of  
114 spectrophotometer, 2) hydrolysis was too weak to calculate the  $k_{\text{cat}}$ . The  $k_{\text{cat}}$ ,  $K_{\text{m}}$ , and  $K_{\text{i}}$   
115 were determined as average values for three independent experiments. The relative  
116 hydrolysis velocity was determined for NDM-1. The initial velocity of each  
117 antibacterial agent was determined at 100  $\mu\text{M}$  for 60 seconds and 200  $\mu\text{M}$  for 100  
118 seconds, and relative velocity was calculated as average values for three independent

119 experiments, assuming those of meropenem to be 100.

120

121

## 122 **References**

- 123 1. **Clinical and Laboratory Standards Institute**. 2012. Methods for dilution  
124 antimicrobial susceptibility tests for bacteria that grow aerobically: Ninth edition.  
125 CLSI document M07-A9. Clinical and Laboratory Standards Institute, Wayne, PA.
- 126 2. **Helander A**. 1999. Absolute or relative measurement of carbohydrate-deficient  
127 transferrin in serum? Experiences with three immunological assays. *Clin Chem*  
128 **45**:131-135.
- 129 3. **Daniels R**. 2009. *Delmar's guide to laboratory and diagnostic tests*, 2nd Edition.  
130 Delmar Cengage Learning.
- 131 4. **Otto BR, Verweij-van Vught AM, MacLaren DM**. 1992. Transferrins and  
132 heme-compounds as iron sources for pathogenic bacteria. *Crit Rev Microbiol*  
133 **18**:217-233.
- 134 5. **Möllmann U, Heinisch L, Bauernfeind A, Kohler T, Ankel-Fuchs D**. 2009.  
135 Siderophores as drug delivery agents: application of the "Trojan Horse" strategy.  
136 *Biometals* **22**:615-624.
- 137 6. **Nakamura R, Toba S, Tsuji M, Yamano Y, Shimada J**. 2014. A novel  
138 siderophore cephalosporin: IV. *In vivo* efficacy in various murine infection models.  
139 54th Intersci. Conf. Antimicrob. Agents Chemother. Washington, DC. F-1558.
- 140 7. **Felici A, Amicosante G, Oratore A, Strom R, Ledent P, Joris B, Fanuel L,**  
141 **Frère JM**. 1993. An overview of the kinetic parameters of class B  $\beta$ -lactamases.  
142 *Biochem J* **291** (Pt 1):151-155.

- 143 8. **Docquier JD, Pantanella F, Giuliani F, Thaller MC, Amicosante G, Galleni M,**  
144 **Frère JM, Bush K, Rossolini GM.** 2002. CAU-1, a subclass B3  
145 metallo- $\beta$ -lactamase of low substrate affinity encoded by an ortholog present in the  
146 *Caulobacter crescentus* chromosome. Antimicrob Agents Chemother.  
147 **46**:1823-1830.
- 148 9. **Alba J, Ishii Y, Thomson K, Moland ES, Yamaguchi K.** 2005. Kinetics study of  
149 KPC-3, a plasmid-encoded class A carbapenem-hydrolyzing  $\beta$ -lactamase.  
150 Antimicrob Agents Chemother **49**:4760-4762.
- 151 10. **Docquier JD, Lamotte-Brasseur J, Galleni M, Amicosante G, Frère JM,**  
152 **Rossolini GM.** 2003. On functional and structural heterogeneity of VIM-type  
153 metallo- $\beta$ -lactamases. J Antimicrob Chemother **51**:257-266.
- 154 11. **Ambler RP.** 1980. The structure of  $\beta$ -lactamases. Philos Trans R Soc Lond B Biol  
155 Sci **289**:321–331.
- 156  
157  
158  
159

160 **Table S1.** MICs of S-649266 and other antibacterial agents against clinical  
 161 strains with various  $\beta$ -lactamases.  
 162

| Species               | Strains          | $\beta$ -lactamases                                       | MIC ( $\mu\text{g/mL}$ ) <sup>a</sup> |             |          |           |
|-----------------------|------------------|-----------------------------------------------------------|---------------------------------------|-------------|----------|-----------|
|                       |                  |                                                           | S-649266                              | Ceftazidime | Cefepime | Meropenem |
| <i>P. aeruginosa</i>  | SR27001          | IMP-1                                                     | 0.5                                   | >256        | >256     | >256      |
| <i>P. aeruginosa</i>  | NUBL-1099        | IMP-1                                                     | 0.016                                 | >256        | 256      | >256      |
| <i>P. aeruginosa</i>  | NUBL-1101        | IMP-1                                                     | 0.5                                   | >256        | 256      | 128       |
| <i>P. aeruginosa</i>  | NTU              | VIM-2                                                     | 1                                     | 256         | 64       | 128       |
| <i>P. aeruginosa</i>  | NUBL-7807        | VIM-2                                                     | 0.5                                   | 128         | 128      | 256       |
| <i>P. aeruginosa</i>  | NUBL-7809        | VIM-2                                                     | 0.25                                  | 128         | 128      | 32        |
| <i>K. pneumoniae</i>  | NCTC13443        | NDM-1                                                     | 2                                     | >256        | >256     | 128       |
| <i>K. pneumoniae</i>  | KOW5             | NDM-1, SHV-11                                             | 0.5                                   | >256        | 32       | 64        |
| <i>K. pneumoniae</i>  | KI2              | NDM-1, TEM-1, SHV-28,<br>CTX-M-15, CMY-6, OXA-1,<br>OXA-9 | 1                                     | >256        | >256     | 256       |
| <i>K. pneumoniae</i>  | ATCC<br>BAA-2146 | NDM-1                                                     | 0.5                                   | >256        | 256      | 128       |
| <i>E. coli</i>        | GUE              | NDM-1, TEM-1, OXA-1                                       | 0.5                                   | >256        | 64       | 16        |
| <i>E. coli</i>        | ALL              | NDM-1, TEM-1, CTX-M-15,<br>OXA-1, OXA-2                   | 1                                     | >256        | >256     | 32        |
| <i>S. maltophilia</i> | SR21970          | L1                                                        | 0.125                                 | 128         | 64       | 256       |
| <i>S. maltophilia</i> | SR44358          | L1                                                        | 0.125                                 | 128         | 64       | 256       |
| <i>S. maltophilia</i> | SR44362          | L1                                                        | 0.5                                   | 256         | 128      | 128       |
| <i>K. pneumoniae</i>  | 286              | KPC-3                                                     | 0.06                                  | 256         | 64       | 16        |
| <i>K. pneumoniae</i>  | 6598             | KPC-3                                                     | 0.06                                  | >256        | >256     | 256       |
| <i>K. pneumoniae</i>  | 10886            | KPC-2                                                     | 0.5                                   | 256         | 64       | 128       |
| <i>K. pneumoniae</i>  | 13717            | KPC-2                                                     | 0.25                                  | >256        | >256     | 256       |
| <i>A. baumannii</i>   | NCTC13301        | OXA-23                                                    | 0.5                                   | >256        | 32       | 32        |
| <i>A. baumannii</i>   | DR25547          | OXA-23, OXA-64<br>(OXA-51group)                           | 0.03                                  | 256         | 16       | 16        |
| <i>A. baumannii</i>   | DU32628          | OXA-23, OXA-66 (OXA-51<br>group)                          | 0.06                                  | 128         | 16       | 16        |
| <i>A. baumannii</i>   | NUBL-7727        | OXA-23                                                    | 0.5                                   | 128         | 128      | 32        |
| <i>A. baumannii</i>   | NUBL-7728        | OXA-23                                                    | 0.25                                  | 128         | 32       | 32        |

163 <sup>a</sup> Cation-adjusted-Mueller Hinton broth was used as a medium, but supplemented with 20  $\mu\text{M}$   
 164 human apo-transferrin for S-649266 to obtain iron-deficient condition.  
 165

166

167



168 **Table S2.** Strains and plasmids used for preparation of  $\beta$ -lactamases.

| $\beta$ -Lactamase | Molecular class <sup>a</sup> | Stain name                                 | Expression vector <sup>b</sup> | Host strain <sup>c</sup>                 |
|--------------------|------------------------------|--------------------------------------------|--------------------------------|------------------------------------------|
| IMP-1              | B                            | <i>Escherichia coli</i> TUM3919            | pET28a                         | <i>Escherichia coli</i> BL21 (DE3)       |
| VIM-2              | B                            | <i>Escherichia coli</i> TUM4664            | pET28a                         | <i>Escherichia coli</i> BL21 (DE3)/pLysS |
| NDM-1              | B                            | <i>Escherichia coli</i> SR08592            | pET9a                          | <i>Escherichia coli</i> BL21-AI          |
| KPC-3              | A                            | <i>Escherichia coli</i> TUM3923            | pET28a                         | <i>Escherichia coli</i> BL21 (DE3)/pLysS |
| OXA-23             | D                            | <i>Escherichia coli</i> TUM3920            | pET28a                         | <i>Escherichia coli</i> BL21 (DE3)       |
| L1                 | B                            | <i>Stenotrophomonas maltophilia</i> ULA511 | -                              | -                                        |

169 <sup>a</sup> Classification as described in Reference 11.

170 <sup>b</sup> The coding region of the  $\beta$ -lactamase was amplified from clinical isolate by PCR and  
 171 cloned into the expression vector.

172 <sup>c</sup> Both series of pET28a and pET9a vectors and *E. coli* BL21 strains were obtained from  
 173 Novagen and Invitrogen, respectively.

174

175

176
